# Supplementary material
Source: Springer Nature journal article supplement (https://www.springermedizin.de/resource/supplementary/13046_2012_561_MOESM3_ESM.pdf/9662452)

Xenograft from  
primary tumor

Xenograft from  
lung metastasis tumor

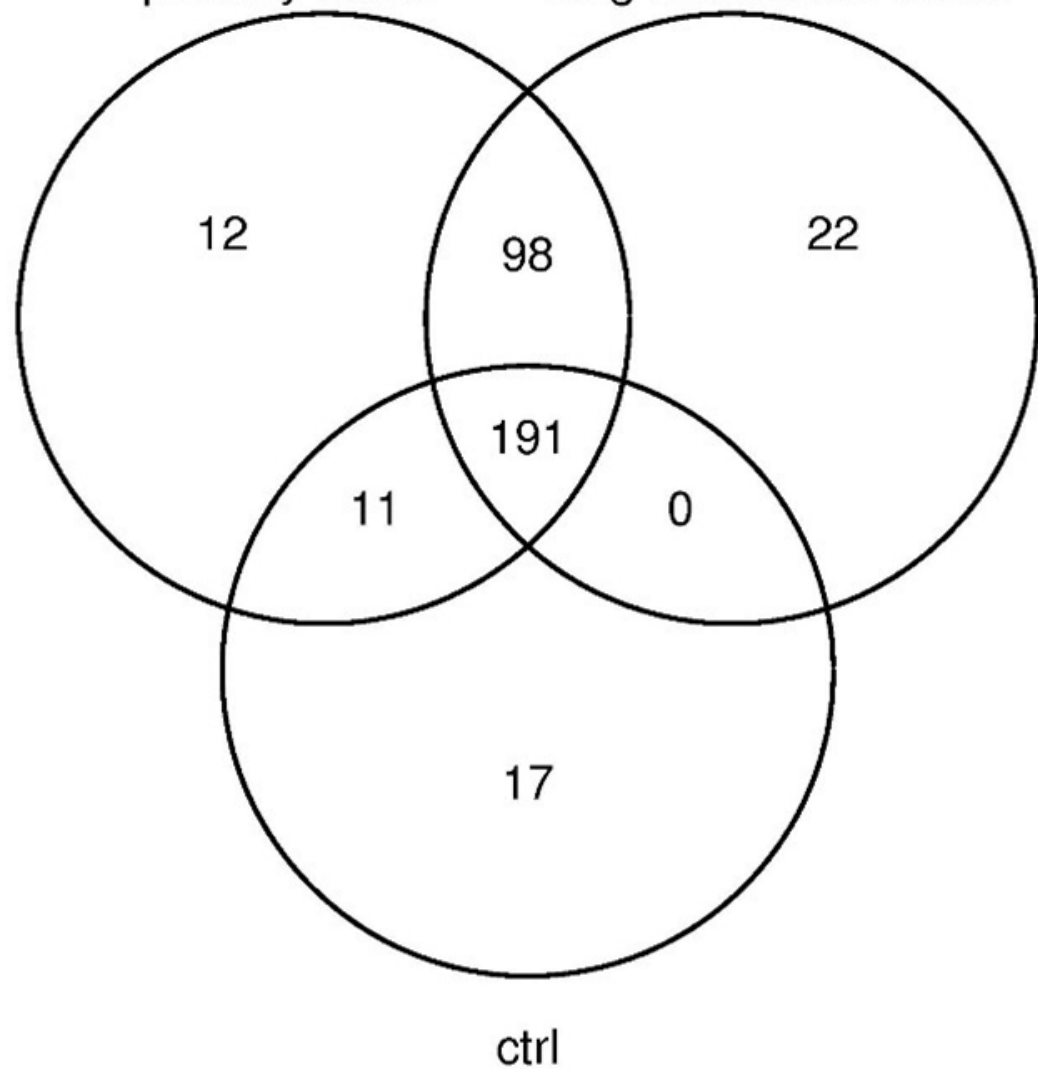

Supplement: MOESM3 [file 9662452]
